# Supplementary material for: Penetration mechanics of a beetle intromittent organ with bending stiffness gradient and a soft tip
Source: PubMed Central journal article supplement — Sci Adv. 2017 Dec 20;3(12):eaao5469. doi: 10.1126/sciadv.aao5469 (PMC5738233; doi:10.1126/sciadv.aao5469), 2017-12-20
Supplement: aao5469_SM.pdf [file aao5469_SM.pdf]

## Supplementary Materials for **Penetration mechanics of a beetle intromittent organ with bending stiffness gradient and a soft tip**

Yoko Matsumura, Alexander E. Kovalev, Stanislav N. Gorb

Published 20 December 2017, *Sci. Adv.* **3**, eaao5469 (2017)

DOI: 10.1126/sciadv.aao5469

### **This PDF file includes:**

- table S1. Flexural rigidity of the flagellum of *C. rubiginosa*.
- table S2. Measurements of the flagellum wall thickness of *C. rubiginosa* (average  $\pm$  SD).
- table S3. Measurements of the flagellum diameter of *C. rubiginosa* (average  $\pm$  SD).

## Supplementary Materials

Table S1. Flexural rigidity of the flagellum of *Cassida rubiginosa*. We measured the flexural rigidity of every second 300  $\mu\text{m}$  sections from the base (position 1) to the apex. Due to variations of the flagellum lengths among individuals treated in the experiment, the number of the measured positions varied among individuals. NA: data are not available.

| individual | Measured position       |                         |                         |                         |                         |                         |                         |                         |                         |                         |                         |                         |                         |                         |                         |                         |                         |
|------------|-------------------------|-------------------------|-------------------------|-------------------------|-------------------------|-------------------------|-------------------------|-------------------------|-------------------------|-------------------------|-------------------------|-------------------------|-------------------------|-------------------------|-------------------------|-------------------------|-------------------------|
|            | 1                       | 2                       | 3                       | 4                       | 5                       | 6                       | 7                       | 8                       | 9                       | 10                      | 11                      | 12                      | 13                      | 14                      | 15                      | 16                      | 17                      |
| 1          | NA                      | 1.334×10 <sup>-13</sup> | 7.259×10 <sup>-14</sup> | 1.765×10 <sup>-13</sup> | 3.737×10 <sup>-13</sup> | 2.090×10 <sup>-13</sup> | 4.850×10 <sup>-13</sup> | 3.899×10 <sup>-13</sup> | 3.915×10 <sup>-13</sup> | NA                      | 9.655×10 <sup>-14</sup> | 1.370×10 <sup>-13</sup> | 1.046×10 <sup>-13</sup> | NA                      | 1.220×10 <sup>-13</sup> |                         |                         |
| 2          | 1.679×10 <sup>-13</sup> | 1.618×10 <sup>-13</sup> | 2.282×10 <sup>-13</sup> | 6.070×10 <sup>-13</sup> | 3.241×10 <sup>-13</sup> | 4.298×10 <sup>-13</sup> | 5.640×10 <sup>-13</sup> | 2.681×10 <sup>-13</sup> | 3.194×10 <sup>-13</sup> | 1.645×10 <sup>-13</sup> | 1.031×10 <sup>-13</sup> | 1.458×10 <sup>-13</sup> | 1.993×10 <sup>-13</sup> | 1.098×10 <sup>-13</sup> | 1.805×10 <sup>-13</sup> |                         |                         |
| 3          | NA                      | NA                      | NA                      | 2.111×10 <sup>-13</sup> | 3.576×10 <sup>-13</sup> | 1.417×10 <sup>-13</sup> | 2.649×10 <sup>-13</sup> | 2.054×10 <sup>-13</sup> | 2.646×10 <sup>-13</sup> | 1.223×10 <sup>-13</sup> | 5.639×10 <sup>-14</sup> | 1.529×10 <sup>-13</sup> | 9.871×10 <sup>-14</sup> | 8.208×10 <sup>-14</sup> | 8.350×10 <sup>-14</sup> |                         |                         |
| 4          | NA                      | NA                      | 6.990×10 <sup>-13</sup> | 3.271×10 <sup>-13</sup> | 2.576×10 <sup>-13</sup> | 7.237×10 <sup>-13</sup> | 2.086×10 <sup>-13</sup> | NA                      | 2.079×10 <sup>-13</sup> | 1.264×10 <sup>-13</sup> | 1.337×10 <sup>-13</sup> | 6.628×10 <sup>-14</sup> | 7.527×10 <sup>-14</sup> |                         |                         |                         |                         |
| 5          | 4.06639E-13             | 3.924×10 <sup>-13</sup> | 1.951×10 <sup>-13</sup> | 2.599×10 <sup>-13</sup> | 1.937×10 <sup>-13</sup> | 4.498×10 <sup>-13</sup> | 2.316×10 <sup>-13</sup> | 3.621×10 <sup>-13</sup> | 1.492×10 <sup>-13</sup> | 1.650×10 <sup>-13</sup> | 9.734×10 <sup>-14</sup> | 2.625×10 <sup>-13</sup> | NA                      | 1.162×10 <sup>-13</sup> | 3.905×10 <sup>-14</sup> |                         |                         |
| 6          | NA                      | 2.611×10 <sup>-13</sup> | 5.229×10 <sup>-13</sup> | 3.082×10 <sup>-13</sup> | 3.856×10 <sup>-13</sup> | 4.305×10 <sup>-13</sup> | 1.462×10 <sup>-13</sup> | 1.432×10 <sup>-13</sup> | 2.300×10 <sup>-13</sup> | 2.320×10 <sup>-13</sup> | NA                      | 1.203×10 <sup>-13</sup> | 1.083×10 <sup>-13</sup> | 1.195×10 <sup>-13</sup> | 1.121×10 <sup>-13</sup> | 8.378×10 <sup>-14</sup> |                         |
| 7          | NA                      | NA                      | 1.658×10 <sup>-13</sup> | 3.087×10 <sup>-13</sup> | NA                      | 2.263×10 <sup>-13</sup> | NA                      | 5.451×10 <sup>-13</sup> | 3.949×10 <sup>-13</sup> | NA                      | NA                      | NA                      | 1.915×10 <sup>-13</sup> | 1.151×10 <sup>-13</sup> | 1.249×10 <sup>-13</sup> |                         |                         |
| 8          | NA                      | 8.550×10 <sup>-14</sup> | NA                      | NA                      | 1.778×10 <sup>-13</sup> | NA                      | 2.621×10 <sup>-13</sup> | 2.946×10 <sup>-13</sup> | 4.032×10 <sup>-13</sup> | 3.217×10 <sup>-13</sup> | 1.937×10 <sup>-13</sup> | 1.558×10 <sup>-13</sup> | NA                      | NA                      | 1.290×10 <sup>-13</sup> | NA                      | 1.595×10 <sup>-13</sup> |
| 9          | NA                      | 1.493×10 <sup>-13</sup> | 2.035×10 <sup>-13</sup> | NA                      | NA                      | 4.342×10 <sup>-13</sup> | 2.747×10 <sup>-13</sup> | 1.821×10 <sup>-13</sup> | NA                      | 1.349×10 <sup>-13</sup> | 1.321×10 <sup>-13</sup> | 7.180×10 <sup>-14</sup> | 1.616×10 <sup>-13</sup> | 1.066×10 <sup>-13</sup> | 9.475×10 <sup>-14</sup> |                         |                         |
| 10         | NA                      | NA                      | 1.991×10 <sup>-13</sup> | 3.025×10 <sup>-13</sup> | 1.921×10 <sup>-13</sup> | 2.162×10 <sup>-13</sup> | NA                      | 2.765×10 <sup>-13</sup> | NA                      | NA                      | 9.331×10 <sup>-14</sup> | NA                      | 9.090×10 <sup>-14</sup> |                         |                         |                         |                         |

Table S2. Measurements of the flagellum wall thickness of *Cassida rubiginosa*, average  $\pm$  s.d. Unit:  $\mu\text{m}$ .

NA: data are not available. In parentheses, the number of measurements from each region is shown.

| individual | Basal               | Sub-basal            | Middle               | Sub-apical          | Apical              |
|------------|---------------------|----------------------|----------------------|---------------------|---------------------|
| 1          | NA                  | 1.13 $\pm$ 0.20 (6)  | 1.19 $\pm$ 0.29 (5)  | 1.04 $\pm$ 0.12 (6) | 0.84 $\pm$ 0.24 (8) |
| 2          | 1.17 $\pm$ 0.11 (6) | 1.05 $\pm$ 0.16 (11) | 0.91 $\pm$ 0.26 (10) | 1.05 $\pm$ 0.04 (3) | NA                  |

Table S3. Measurements of the flagellum diameter of *Cassida rubiginosa*, average  $\pm$  s.d. Unit:  $\mu\text{m}$ . NA: data

are not available. In parentheses, the number of measurements from each region is shown.

| Individual | Basal               | Sub-basal           | Middle              | Sub-apical          | Apical              |
|------------|---------------------|---------------------|---------------------|---------------------|---------------------|
| 1          | NA                  | 6.01 (1)            | 6.07 (1)            | 5.32 $\pm$ 1.18 (3) | 4.88 $\pm$ 0.51 (4) |
| 2          | 6.15 $\pm$ 1.03 (2) | 6.03 $\pm$ 0.27 (2) | 6.04 $\pm$ 1.24 (3) | 5.27 $\pm$ 0.52 (2) | NA                  |
